# Supplementary material for: Room-temperature doping of ytterbium into efficient near-infrared emission CsPbBr1.5Cl1.5 perovskite quantum dots
Source: Royal Society of Chemistry journal article supplement (doi:10.1039/d0cc01193b), 2020-01-01
Supplement: d0cc01193b1.pdf [file d0cc01193b1.pdf]

## Supporting Information

### Room-temperature Doping of Ytterbium into Efficient Near-infrared Emission CsPbBr<sub>1.5</sub>Cl<sub>1.5</sub> Perovskite Quantum Dots

Shuangyi Zhao,<sup>a</sup> Yubo Zhang<sup>b</sup> and Zhigang Zang<sup>\*a</sup>

<sup>a</sup> Key Laboratory of Optoelectronic Technology & Systems (Minster of Education), Chongqing University,  
Chongqing, China

<sup>b</sup> Department of Physics, Southern University of Science and Technology, Shenzhen, China  
[zangzg@cqu.edu.cn](mailto:zangzg@cqu.edu.cn)

## Experimental Section

### 1. Materials

Cesium carbonate (Cs<sub>2</sub>CO<sub>3</sub>, 99.9%), lead bromide (PbBr<sub>2</sub>, 99.9%) and Lead chloride (PbCl<sub>2</sub>, 99.9%) were purchased from Xi'an polymer Light Technology Corp. Oleic acid (OA, >90%), Oleylamine (OAm, >90%) and Octadecene (ODE, >90%) were purchased from Adamas. Ytterbium nitrate pentahydrate (Yb(NO<sub>3</sub>)<sub>3</sub>·5H<sub>2</sub>O, 99.9%) was purchased from Alfa Aesar. All these reagents were used without further purification.

### 2. Synthesis of intrinsic CsPbBr<sub>3</sub> QDs

81.5 mg Cs<sub>2</sub>CO<sub>3</sub>, 4 mL ODE, and 0.5 mL OA were loaded into 100 mL three-neck flask to prepare the Cs-precursor. 138 mg PbBr<sub>2</sub> and 5 mL ODE were loaded into another 100 mL three-neck flask. The two flasks were degassed for 10 min. Then the flasks were heated to 120 °C under nitrogen flow for 1 h. After 1 h, 0.5 mL OAm and 0.5 mL OA were quickly injected into the Pb-flask at 120 °C, and then the temperature was increased to 150 °C. After 2 min, 0.8 mL Cs-precursor was injected quickly into the Pb-flask and the mixture was cooled in the ice-water bath to room temperature after 5 ~ 10 s.

### **3. Preparation of PbCl<sub>2</sub> anion source**

55.62 mg PbCl<sub>2</sub>, 10 mL ODE and 0.5 mL OA and 0.5 mL OAm were loaded into 100 mL three-neck flask to prepare the PbCl<sub>2</sub> anion source. The flask was degassed for 20 min and then heated 120 °C under nitrogen flow for 30 min. After 30 min, 1 mL OA and 1 mL OAm were added into the flask and the temperature was raised to 170 °C. After 5 min, the flask was cooled to the room-temperature and the golden yellow solution of PbCl<sub>2</sub> solution was obtained.

### **4. Preparation of Yb-precursor**

17.97 mg Yb(NO<sub>3</sub>)<sub>3</sub>·5H<sub>2</sub>O was dissolved in a mixture of methyl acetate : toluene with volume ratio of 1 : 3. The Yb(NO<sub>3</sub>)<sub>3</sub>·5H<sub>2</sub>O solution was stirred for 30 min and the 0.01 mmol/mL transparent Yb-precursor solution was obtained.

### **5. Anion exchange of Cl<sup>-</sup> ions and doping of Yb<sup>3+</sup> ions**

The 2 mL as-synthesized CsPbBr<sub>3</sub> QDs were centrifuged for 5 min at 10000 rpm and the supernatant was discarded. The pellet was resuspended in the toluene. The 1.44 mL PbCl<sub>2</sub> solution was added into the CsPbBr<sub>3</sub> QDs toluene solution and then stirred for 30 s to form the CsPbBr<sub>1.5</sub>Cl<sub>1.5</sub> QDs.

The different amounts of Yb precursor were added into the CsPbBr<sub>1.5</sub>Cl<sub>1.5</sub> QDs dispersion under continuous stirring for 10 min to achieve different Yb-dopant concentrations. Then the Yb doped CsPbBr<sub>1.5</sub>Cl<sub>1.5</sub> QDs centrifuged for 5 min at 10000 rpm and the supernatant was discarded. The obtained pellet was resuspended in the toluene.

### **6. Characterization**

The crystal phases of the samples was characterized by XRD with Cu Ka radiation (XRD-6100, SHIMADZU, Japan). The TEM was measured by an electron microscope (Libra 200 FE, Zeiss, Germany). Absorption spectrum was recorded ranging from 300 to 800 nm by a UV-vis spectrophotometer (UV-2100, SHIMADZU, Japan) under room temperature. The XPS results were performed on an Escalab 250 Xi. The

photoluminescence (PL) spectroscopy and the data of PL QY were measured by a PL system. The PL system (FLS920, Edinburgh Instruments) that was capable of measuring PL and PLQYs with an integration sphere was employed in this work. Moreover, the PL system consists of a Vis and a NIR photomultiplier, which can detect the light in the visible and NIR regions, respectively. Each sample of Yb-doped CsPbBr<sub>1.5</sub>Cl<sub>1.5</sub> toluene solution was loaded into a clear quartz cuvette and was excited by a xenon lamp with the wavelength of 350 nm. The emission signals were collected and the corresponding emission spectra integrated area could be regarded as the photon energy of emission light ( $E_{em}$ ). In addition, the scattering intensity of a blank (solvent only) ( $E_{bg}$ ) and the samples ( $E_{sa}$ ) could be obtained from the integrated PL spectra of solvent and samples under the 350 nm excitation. The PLQY can be calculated by:

$$QY = E_{em} / (E_{bg} - E_{sa})$$

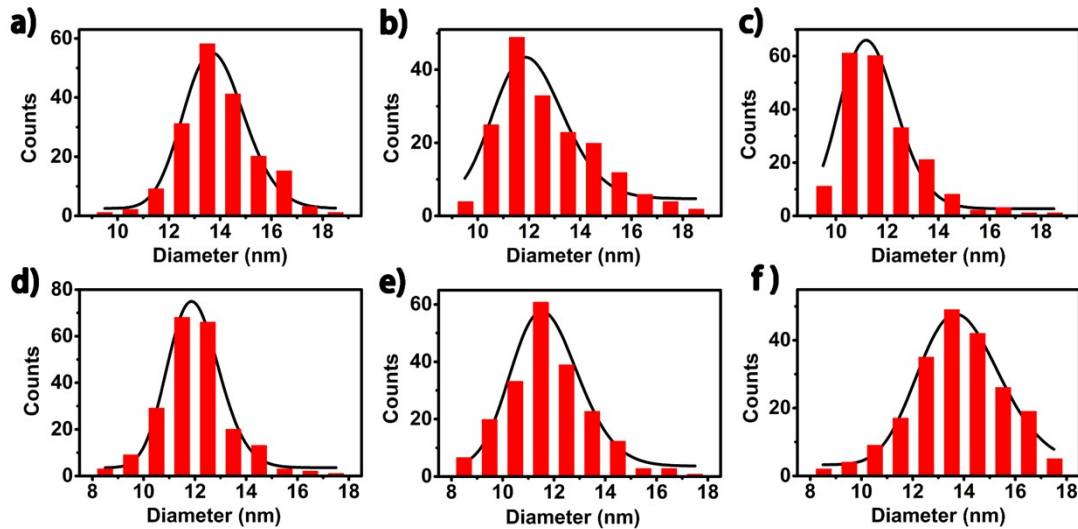

**Figure S1.** Size distribution of a) undoped CsPbBr<sub>1.5</sub>Cl<sub>1.5</sub> QDs, b) 5% Yb, c) 8% Yb, d) 10% Yb, e) 20% Yb, f) 30% Yb doped CsPbBr<sub>1.5</sub>Cl<sub>1.5</sub> QDs

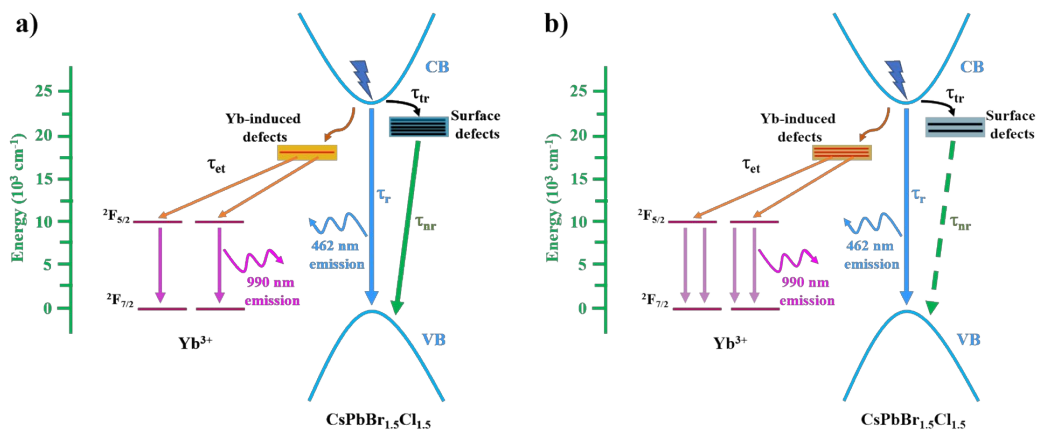

**Scheme 1.** Schematic diagram of the energy transfer process of CsPbBr<sub>1.5</sub>Cl<sub>1.5</sub> QDs doped with a) low amount of Yb and b) high amount of Yb.

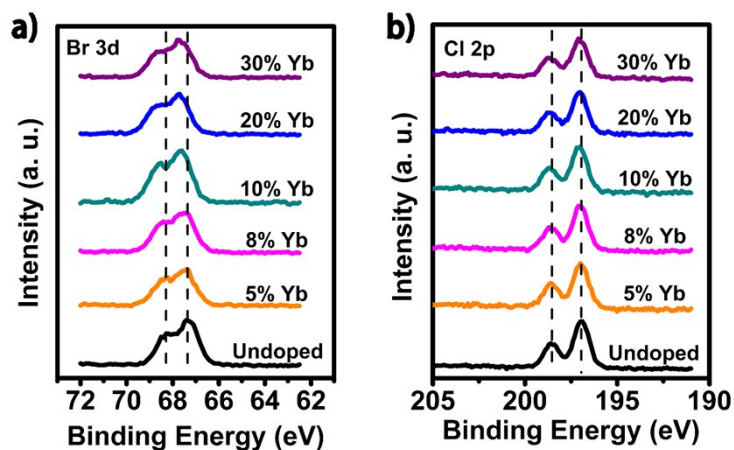

**Figure S2.** High-resolution X-ray photoelectron spectroscopy (XPS) spectra of a) Br 3d and b) Cl 2p for undoped and Yb-doped CsPbBr<sub>1.5</sub>Cl<sub>1.5</sub> QDs.

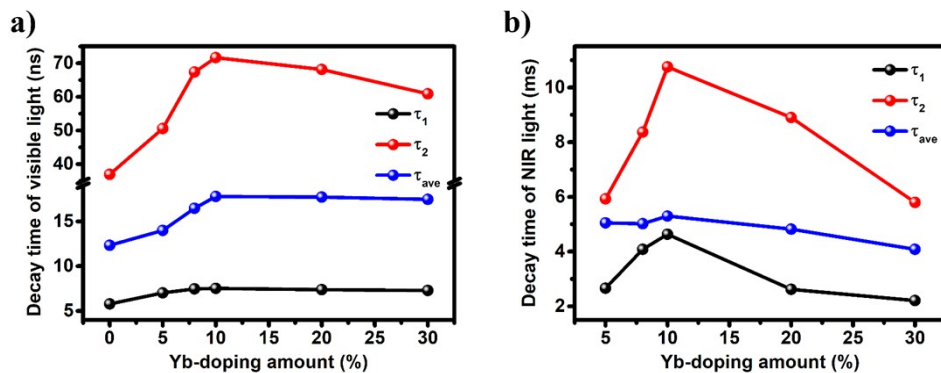

**Figure S3.** Dependence of a) visible PL and b) NIR PL decay lifetime, including fast decay time (τ<sub>1</sub>), slow decay time (τ<sub>2</sub>) and average decay time (τ<sub>ave</sub>), on the Yb incorporation amount.

PL decay curves can be fitted with a bi-exponential decay function consisting of a fast decay time ( $\tau_1$ ) and a slow decay time ( $\tau_2$ ). The average decay time ( $\tau_{ave}$ ) can be calculated as following:

$$\tau_{ave} = \frac{\sum A_i \tau_i^2}{\sum A_i \tau_i}$$

$\tau_1$  is speculated to be the trap-assisted recombination, while  $\tau_2$  is speculated to be the free-charge carrier radiative recombination.<sup>1</sup> The increase of With the increase of Yb-doping amount, the decay time changes. The increase of decay time is attributed to the reduction of surface traps and suppression of exciton quenching.<sup>2</sup> Therefore, the incorporation of optimal amount of Yb<sup>3+</sup> ions is proved to enhance the quality of QDs and improve their optical performance.

**Table S1.** Summary of visible photoluminescent decay time of Yb-doped CsPbBr<sub>1.5</sub>Cl<sub>1.5</sub> QDs

|         | $\tau_1$ (ns) | $A_1$ | $\tau_2$ (ns) | $A_2$ | $\tau_{ave}$ (ns) |
|---------|---------------|-------|---------------|-------|-------------------|
| Undoped | 5.79          | 0.79  | 36.94         | 0.21  | 12.33             |
| 5% Yb   | 7.02          | 0.84  | 50.59         | 0.16  | 13.99             |
| 8% Yb   | 7.47          | 0.85  | 67.41         | 0.15  | 16.46             |
| 10% Yb  | 7.52          | 0.84  | 71.70         | 0.16  | 17.79             |
| 20% Yb  | 7.39          | 0.83  | 68.13         | 0.17  | 17.71             |
| 30% Yb  | 7.29          | 0.81  | 60.91         | 0.19  | 17.47             |

1. N. Yarita, H. Tahara, T. Ihara, T. Kawawaki, R. Sato, M. Saruyama, T. Teranishi, Y. Kanemitsu, *J. Phys. Chem. Lett.* 2017, 8, 1413.
2. H. Cho, S. H. Jeong, M. H. Park, Y. H. Kim, C. Wolf, C. L. Lee, J. H. Heo, A. Sadhanala, N. Myoung, S. Yoo, S. H. Im, R. H. Friend, T. W. Lee, *Science* 2015, 350, 1222.
